# Supplementary material for: Networking and Specificity-Changing DNA Methyltransferases in Helicobacter pylori
Source: Front Microbiol. 2020 Jul 17;11:1628. doi: 10.3389/fmicb.2020.01628 (PMC7379913; doi:10.3389/fmicb.2020.01628)
Supplement: TABLE S1 — Methylomes of methyltransferase knockout mutants. [file Table_1.XLSX]

## Sheet: Sheet1
Table S1. Methylomes of methyltransferase knockout mutants.
Motif	RM system	Responsible M gene	# of sites in the wt chr.	# of methylated site in the wt chr.1	Fraction of methylated motifs
[Strain P12 and its derivatives]					P12	ΔHPP12_1497 (PIK40)	ΔHPP12_1365 (PIK38)	ΔHPP12_1377 (PIK39)
GACC	Type III	M.HpyPX2	2579	2578	1	0.05 3	1	0.98
GNGRGA	unknown	unknown	3988	3983	1	1	1	0.97
GCGCGC	unknown	unknown	500	311	0.62	0.68	0.68	0.62
GAGG	Type IIS	M1.HpyPVI	4854	4833	1	0.99	1	0.96
TCNNGA	Type IIP	M.HpyPVIII	3948	3946	1	1	1	0.97
ATTAAT	Type IIP	M.HpyPVII	956	940	0.98	0.98	0.98	0.94
GAAGG	Type IIS	M1.HpyPV	1332	1332	1	1	1	0.96
GTAC	Type IIP	M.HpyPIV	258	258	1	1	1	0.98
GATC	Type IIP	M.HpyPIII	10532	10532	1	1	1	0.97
GAATTC	Type IIP	M.HpyPII	348	342	0.98	0.98	0.99	0.95
CATG	Type IIP	M.HpyPI	14686	14678	1	1	1	0.97
CTANNNNNNNNTTC	Type I	S.HpyPORF797 (HPP12_0797)	776	776	1	1	1	0.97
GAANNNNNNNNTAG	Type I	S.HpyPORF797 (HPP12_0797)	776	775	1	1	1	0.95
GRNAANNNNNNNTAYC	Type I	S.HpyPORF1508 (HPP12_1508)	188	187	0.99	1	1	0.94
GRTANNNNNNNTTNYC	Type I	S.HpyPORF1508 (HPP12_1508)	188	188	1	1	1	1
[Strain 26695 and its derivatives]					26695	ΔhpyAXM (PIK14)	ΔhpyAXIM (PIK16)	ΔhpyAXIIIS (PIK17)
ATTAAT	Type IIP	M.HpyAXII	970	962	0.99	0.99	0.99	0.99
CATG	Type IIP	M.HpyAI	14776	14776	1	1	1	1
CTANNNNNNNNTGT	Type I	M.HpyAXIII	328	326	0.99	0.99	0.99	0
ACANNNNNNNNTAG	Type I	M.HpyAXIII	328	325	0.99	0.98	0.99	0
GAAGA	Type IIS	M1. HpyAII	4821	4821	1	1	1	1
TCTTC	Type IIS	M2. HpyAII	4821	4804	1	1	1	1
GANTC	Type IIP	M.HpyAIV	5568	5566	1	1	1	1
GATC	Type IIP	M.HpyAIII	10836	10836	1	1	1	1
GCAG	Type III	M.HpyAXI	4261	4261	1	1	0	1
TCGA	Type IIP	M.HpyAX	608	608	1	0	1	1
GAGG	Type IIS	M1.HpyAVI	4888	4883	1	1	1	1
GAAGG	Type II	M.HpyAV	1303	1249	0.96	0.96	0.96	0.96
CGRAT	unknown	M.HpyAXV	3275	3267	1	1	0.99	0.99
1. Quality value 30 was used as the threshold. m4C and m6A were detected.
2. Proposed in this study.
3. There are overlaps of GACC with TCNNGA (67 sites) and GNGRGA (40 sites).
