# Supplementary material for: Networking and Specificity-Changing DNA Methyltransferases in Helicobacter pylori
Source: Front Microbiol. 2020 Jul 17;11:1628. doi: 10.3389/fmicb.2020.01628 (PMC7379913; doi:10.3389/fmicb.2020.01628)
Supplement: TABLE S2 — Genomic segments with high and low GACC abundance. [file Table_2.XLSX]

## Sheet: P12_10kb_widnow_Mr_GACC
Table S2. Genomic segments wih high and low GACC abundance
start	end	obs_count	exp_count	relative abundance (Mr)	region_name	class	Genes in the window
110501	120500	8	29.566	0.270581	cysK-dnaK	underrepresented	HPP12_RS00560, HPP12_RS00565, metB, cysK, dnaK, grpE, HPP12_RS00595, HPP12_RS00600, HPP12_RS00605, HPP12_RS00610
306001	316000	26	26.5537	0.979149	amiE	high frequency	pabB, amiE, flgE, rplU, rpmA, dppA, dppB, dppC
307001	317000	27	27.9348	0.966535	amiE	high frequency	pabB, amiE, flgE, rplU, rpmA, dppA, dppB, dppC, dppD
366501	376500	6	22.3648	0.268279	ftsK	underrepresented	ftsK, HPP12_RS01845, HPP12_RS01850, HPP12_RS01855, HPP12_RS01860, HPP12_RS01865, pyrB, HPP12_RS01875, hofB
367501	377500	5	22.0846	0.226402	ftsK	underrepresented	ftsK, HPP12_RS01845, HPP12_RS01850, HPP12_RS01855, HPP12_RS01860, HPP12_RS01865, pyrB, HPP12_RS01875, hofB
368001	378000	5	22.1639	0.225592	ftsK	underrepresented	ftsK, HPP12_RS01845, HPP12_RS01850, HPP12_RS01855, HPP12_RS01860, HPP12_RS01865, pyrB, HPP12_RS01875, hofB
467501	477500	18	18.6735	0.963934	PZ1	high frequency	HPP12_RS02300, parA, HPP12_RS02310, HPP12_RS02315, virD2-1, HPP12_RS02325, HPP12_RS02330, virD4
468001	478000	18	18.2429	0.986686	PZ1	high frequency	HPP12_RS02300, parA, HPP12_RS02310, HPP12_RS02315, virD2-1, HPP12_RS02325, HPP12_RS02330, virD4
468501	478500	18	17.4341	1.03246	PZ1	high frequency	HPP12_RS02300, parA, HPP12_RS02310, HPP12_RS02315, virD2-1, HPP12_RS02325, HPP12_RS02330, virD4, HPP12_RS02345
469001	479000	17	16.848	1.00902	PZ1	high frequency	HPP12_RS02300, parA, HPP12_RS02310, HPP12_RS02315, virD2-1, HPP12_RS02325, HPP12_RS02330, virD4, HPP12_RS02345, HPP12_RS02350
469501	479500	16	16.4019	0.975495	PZ1	high frequency	HPP12_RS02300, parA, HPP12_RS02310, HPP12_RS02315, virD2-1, HPP12_RS02325, HPP12_RS02330, virD4, HPP12_RS02345, HPP12_RS02350, virB11
470001	480000	17	16.997	1.00018	PZ1	high frequency	HPP12_RS02300, parA, HPP12_RS02310, HPP12_RS02315, virD2-1, HPP12_RS02325, HPP12_RS02330, virD4, HPP12_RS02345, HPP12_RS02350, virB11, HPP12_RS02360
470501	480500	16	16.471	0.971407	PZ1	high frequency	parA, HPP12_RS02310, HPP12_RS02315, virD2-1, HPP12_RS02325, HPP12_RS02330, virD4, HPP12_RS02345, HPP12_RS02350, virB11, HPP12_RS02360, HPP12_RS02365, HPP12_RS02370, virB10
471501	481500	18	17.3314	1.03858	PZ1	high frequency	HPP12_RS02315, HPP12_RS02320, virD2-1, HPP12_RS02330, HPP12_RS02335,virD4, HPP12_RS02350, HPP12_RS02355,virB11, HPP12_RS02365,HPP12_RS02370, virB10
677001	687000	24	23.7607	1.01007	hyd operon	high frequency	murC, aspB1, ispG, dapD, hcpF, HPP12_RS03275, mdaB, hydA, hydB
677501	687500	23	23.8764	0.963294	hyd operon	high frequency	murC, aspB1, ispG, dapD, hcpF, HPP12_RS03275, mdaB, hydA, hydB
678501	688500	25	25.3683	0.985482	hyd operon	high frequency	aspB1, ispG, dapD, hcpF, HPP12_RS03275, mdaB, hydA, hydB
679001	689000	26	25.6845	1.01228	hyd operon	high frequency	aspB1, ispG, dapD, hcpF, HPP12_RS03275, mdaB, hydA, hydB, hydC
679501	689500	23	23.8052	0.966177	hyd operon	high frequency	ispG, dapD, hcpF, HPP12_RS03275, mdaB, hydA, hydB, hydC, hydD
680501	690500	24	24.7204	0.970858	hyd operon	high frequency	ispG, dapD, hcpF, HPP12_RS03275, mdaB, hydA, hydB, hydC, hydD
705001	715000	9	32.9322	0.273289	pfr	underrepresented	HPP12_RS03385, fucT, serB, pfr, HPP12_RS03405, HPP12_RS03410, HPP12_RS03415, HPP12_RS03420, gatB
826001	836000	6	23.6441	0.253764	moaA	underrepresented	moaA, HPP12_RS03940, flhB-1, HPP12_RS03950, amiA, HPP12_RS03960, tyrS, spoT
881001	891000	6	24.2007	0.247927	atpB	underrepresented	HPP12_RS04210, HPP12_RS04215,HPP12_RS04220, trxA, trxB, HPP12_RS04235 ,HPP12_RS04240, atpB, guaB, gatA, HPP12_RS04260, speE, HPP12_RS04270
881501	891500	6	23.6625	0.253565	atpB	underrepresented	uvrC, hom, HPP12_RS04220, trxA, trxB, HPP12_RS04235, HPP12_RS04240, atpB, guaB, gatA, HPP12_RS04260, HPP12_RS04265, HPP12_RS04270
882001	892000	5	23.3942	0.213728	atpB	underrepresented	hom, HPP12_RS04220, trxA, trxB, HPP12_RS04235, HPP12_RS04240, atpB, guaB, gatA, HPP12_RS04260, HPP12_RS04265, HPP12_RS04270, engA
882501	892500	5	21.9037	0.228272	atpB	underrepresented	hom, HPP12_RS04220, trxA, trxB, HPP12_RS04235, HPP12_RS04240, atpB, guaB, gatA, HPP12_RS04260, HPP12_RS04265, HPP12_RS04270, engA
883001	893000	5	22.4872	0.222349	atpB	underrepresented	HPP12_RS04220, trxA, trxB, HPP12_RS04235, HPP12_RS04240, atpB, guaB, gatA, HPP12_RS04260, HPP12_RS04265, HPP12_RS04270, engA
883501	893500	6	22.3885	0.267995	atpB	underrepresented	trxA, trxB, HPP12_RS04235, HPP12_RS04240, atpB, guaB, gatA, HPP12_RS04260, HPP12_RS04265, HPP12_RS04270, engA
884001	894000	4	20.8732	0.191633	atpB	underrepresented	trxB, HPP12_RS04235, HPP12_RS04240, atpB, guaB, gatA, HPP12_RS04255, HPP12_RS04260, speE, HPP12_RS04270, engA, hpyHU, HPP12_RS04290, tRNA-Arg
884501	894500	5	21.5822	0.231673	atpB	underrepresented	trxB, HPP12_RS04235, HPP12_RS04240, atpB, guaB, gatA, HPP12_RS04255, HPP12_RS04260, speE, HPP12_RS04270, engA, hpyHU, HPP12_RS04290, tRNA-Arg, hup
1120501	1130500	6	23.2742	0.257797	hpyPVIII	underrepresented	HPP12_RS05330, HPP12_RS05335, hpyPVIIIM, hpyPVIIIR, HPP12_RS05350, HPP12_RS05355, nrdB
1247001	1257000	32	33.1361	0.965715	rpoB	high frequency	rpoB, rplL, rpJ, rplA, rplK, nusG, secE
1333501	1343500	5	19.25	0.25974	trp operon	underrepresented	trpC, trpD, trpG, trpE, HPP12_RS06415, HPP12_RS06420, HPP12_RS06425, HPP12_RS06430, TenA
1334001	1344000	5	19.2508	0.25973	trp operon	underrepresented	trpC, trpD, trpG, trpE, HPP12_RS06415, HPP12_RS06420, HPP12_RS06425, HPP12_RS06430, TenA, HPP12_RS06440
1363501	1373500	7	25.7449	0.271899	crd operon	underrepresented	fumC, crdA, HPP12_RS06635, czcB, czcA, HPP12_RS06650, HPP12_RS06655, dnaJ
1403001	1413000	24	24.5745	0.976621	PZ3	high frequency	virB10, unannotated hypothetical protein, unannotated hypothetical protein, HPP12_RS06830, HPP12_RS06835, virB11, HPP12_RS06845, virD4, topA-5', topA-3', HPP12_RS06860
1403501	1413500	23	22.9758	1.00105	PZ3	high frequency	unannotated hypothetical protein, unannotated hypothetical protein, HPP12_RS06830, HPP12_RS06835, virB11, HPP12_RS06845, virD4, topA-5', topA-3', HPP12_RS06860, HPP12_RS06865
1404001	1414000	23	23.3189	0.986324	PZ3	high frequency	unannotated hypothetical protein, unannotated hypothetical protein, HPP12_RS06830, HPP12_RS06835, virB11, HPP12_RS06845, virD4, topA-5', topA-3', HPP12_RS06860, HPP12_RS06865, HPP12_RS06870
1404501	1414500	23	23.0279	0.998789	PZ3	high frequency	unannotated hypothetical protein, HPP12_RS06830, HPP12_RS06835, virB11, HPP12_RS06845, virD4, topA-5', topA-3', HPP12_RS06860, HPP12_RS06865, HPP12_RS06870
1405001	1415000	23	23.2265	0.990248	PZ3	high frequency	unannotated hypothetical protein, HPP12_RS06830, HPP12_RS06835, virB11, HPP12_RS06845, virD4, topA-5', topA-3', HPP12_RS06860, HPP12_RS06865, HPP12_RS06870, unannotated hypothetical protein, unannotated hypothetical protein
1405501	1415500	22	21.5746	1.01972	PZ3	high frequency	unannotated hypothetical protein, HPP12_RS06830, HPP12_RS06835, virB11, HPP12_RS06845, virD4, topA-5', topA-3', HPP12_RS06860, HPP12_RS06865, HPP12_RS06870, unannotated hypothetical protein, unannotated hypothetical protein
1406001	1416000	21	20.2715	1.03594	PZ3	high frequency	unannotated hypothetical protein, HPP12_RS06830, HPP12_RS06835, virB11, HPP12_RS06845, virD4, topA-5', topA-3', HPP12_RS06860, HPP12_RS06865, HPP12_RS06870, unannotated hypothetical protein, unannotated hypothetical protein, HPP12_RS06880
1406501	1416500	22	21.7106	1.01333	PZ3	high frequency	HPP12_RS06830, HPP12_RS06835, virB11, HPP12_RS06845, virD4, topA-5', topA-3', HPP12_RS06860, HPP12_RS06865, HPP12_RS06870, unannotated hypothetical protein, unannotated hypothetical protein, HPP12_RS06880, HPP12_RS06885, unannotated hypothetical protein
1407001	1417000	20	20.5776	0.971929	PZ3	high frequency	virB11, HPP12_RS06845, virD4, topA-5', topA-3', HPP12_RS06860, HPP12_RS06865, HPP12_RS06870, unannotated hypothetical protein, unannotated hypothetical protein, HPP12_RS06880, HPP12_RS06885, unannotated hypothetical protein, HPP12_RS06895
1408001	1418000	21	21.6795	0.968657	PZ3	high frequency	HPP12_RS06845, virD4, topA-5', topA-3', HPP12_RS06860, HPP12_RS06865, HPP12_RS06870, unannotated hypothetical protein, unannotated hypothetical protein, HPP12_RS06880, HPP12_RS06885, unannotated hypothetical protein, HPP12_RS06895, HPP12_RS06900
1553001	1563000	7	26.8019	0.261175	hopL	underrepresented	rplY, pth, unnanotated protein, HPP12_RS07545, HPP12_RS07550, hopL, HPP12_RS07565, fixI, HPP12_RS07575, HPP12_RS07580
1585001	1595000	5	21.5795	0.231701	HpyPX (GACC)-dnaA	underrepresented	mod-5 (=hpypXM), recG, HPP12_RS07670, horD, exoA, comH, dnaA,HPP12_RS07705, HPP12_RS07710, glmS
1585501	1595500	5	21.2087	0.235753	HpyPX (GACC)-dnaA	underrepresented	mod-5 (=hpypXM), recG, HPP12_RS07670, horD, exoA, comH, dnaA,HPP12_RS07705, HPP12_RS07710, glmS
1586001	1596000	5	19.6072	0.255008	HpyPX (GACC)-dnaA	underrepresented	mod-5 (=hpypXM), recG, HPP12_RS07670, horD, exoA, comH, dnaA,HPP12_RS07705, HPP12_RS07710, glmS
1586501	1596500	4	17.9407	0.222956	HpyPX (GACC)-dnaA	underrepresented	mod-5 (=hpypXM), recG, HPP12_RS07670, horD, exoA, comH, dnaA,HPP12_RS07705, HPP12_RS07710, glmS
1587001	1597000	3	17.9353	0.167268	HpyPX (GACC)-dnaA	underrepresented	mod-5 (=hpypXM), recG, HPP12_RS07670, horD, exoA, comH, dnaA,HPP12_RS07705, HPP12_RS07710, glmS, thyX
1587501	1597500	3	17.0889	0.175553	HpyPX (GACC)-dnaA	underrepresented	recG, HPP12_RS07670, horD, exoA, comH, dnaA,HPP12_RS07705, HPP12_RS07710, glmS, thyX
1588001	1598000	3	16.9565	0.176923	HpyPX (GACC)-dnaA	underrepresented	recG, HPP12_RS07670, horD, exoA, comH, dnaA,HPP12_RS07705, HPP12_RS07710, glmS, thyX
1588501	1598500	4	18.7055	0.213841	HpyPX (GACC)-dnaA	underrepresented	recG, HPP12_RS07670, horD, exoA, comH, dnaA,HPP12_RS07705, HPP12_RS07710, glmS, thyX, HPP12_RS07725
1589001	1599000	4	20.3175	0.196875	HpyPX (GACC)-dnaA	underrepresented	recG, HPP12_RS07670, horD, exoA, comH, dnaA,HPP12_RS07705, HPP12_RS07710, glmS, thyX, HPP12_RS07725, Type IS protein (=HPP12_1508 )
1589501	1599500	4	20.5979	0.194195	HpyPX (GACC)-dnaA	underrepresented	horD, exoA, comH, dnaA,HPP12_RS07705, HPP12_RS07710, glmS, thyX, HPP12_RS07725, Type IS protein (=HPP12_1508 ), Type IM protein (inactivated )
1590001	1600000	4	20.8518	0.19183	HpyPX (GACC)-dnaA	underrepresented	horD, exoA, comH, dnaA,HPP12_RS07705, HPP12_RS07710, glmS, thyX, HPP12_RS07725, Type IS protein (=HPP12_1508 ), Type IM protein (inactivated )
1590501	1600500	4	20.3959	0.196118	HpyPX (GACC)-dnaA	underrepresented	exoA, comH, dnaA,HPP12_RS07705, HPP12_RS07710, glmS, thyX, HPP12_RS07725, Type IS protein (=HPP12_1508 ), Type IM protein (inactivated )
1591001	1601000	5	20.2665	0.246713	HpyPX (GACC)-dnaA	underrepresented	comH, dnaA,HPP12_RS07705, HPP12_RS07710, glmS, thyX, HPP12_RS07725, Type IS protein (=HPP12_1508 ), Type IM protein (inactivated )
1592501	1602500	5	20.3893	0.245227	HpyPX (GACC)-dnaA	underrepresented	comH, dnaA,HPP12_RS07705, HPP12_RS07710, glmS, thyX, HPP12_RS07725, Type IS protein (=HPP12_1508 ), Type IM protein (inactivated )
1593001	1603000	5	20.7236	0.241271	HpyPX (GACC)-dnaA	underrepresented	dnaA, HPP12_RS07705, HPP12_RS07710, glmS, thyX, HPP12_RS07725, Type IS protein (=HPP12_1508 ), Type IM protein (inactivated ), Type IR protein (inactivated )
1657501	1667500	24	24.8935	0.964107	flhB-2	high frequency	HPP12_RS07985, HPP12_RS07990, rlpA,dniR,ribC, flhB-2,HPP12_RS08020,HPP12_RS08025,HPP12_RS08030, HPP12_RS08035, HPP12_RS08040, pdxJ, HPP12_RS08050
1658001	1668000	24	24.9252	0.962879	flhB-2	high frequency	HPP12_RS07990, rlpA,dniR,ribC, flhB-2,HPP12_RS08020,HPP12_RS08025,HPP12_RS08030, HPP12_RS08035, HPP12_RS08040, pdxJ,
1658501	1668500	24	23.7821	1.00916	flhB-2	high frequency	rlpA, dniR,ribC, flhB-2,HPP12_RS08020,HPP12_RS08025,HPP12_RS08030, HPP12_RS08035, HPP12_RS08040, pdxJ, pdxA
1659001	1669000	26	22.5462	1.15319	flhB-2	high frequency	rlpA, dniR,ribC, flhB-2,HPP12_RS08020,HPP12_RS08025,HPP12_RS08030, HPP12_RS08035, HPP12_RS08040, pdxJ, pdxA
1659501	1669500	25	21.7283	1.15058	flhB-2	high frequency	rlpA, dniR,ribC, flhB-2,HPP12_RS08020,HPP12_RS08025,HPP12_RS08030, HPP12_RS08035, HPP12_RS08040, pdxJ, pdxA
1660001	1670000	22	20.696	1.06301	flhB-2	high frequency	dniR,ribC, flhB-2,HPP12_RS08020,HPP12_RS08025,HPP12_RS08030, HPP12_RS08035, HPP12_RS08040, pdxJ, pdxA, HPP12_RS08060, flgG-2
